# Supplementary material
Source: PubMed Central journal article supplement (PMC5428098)

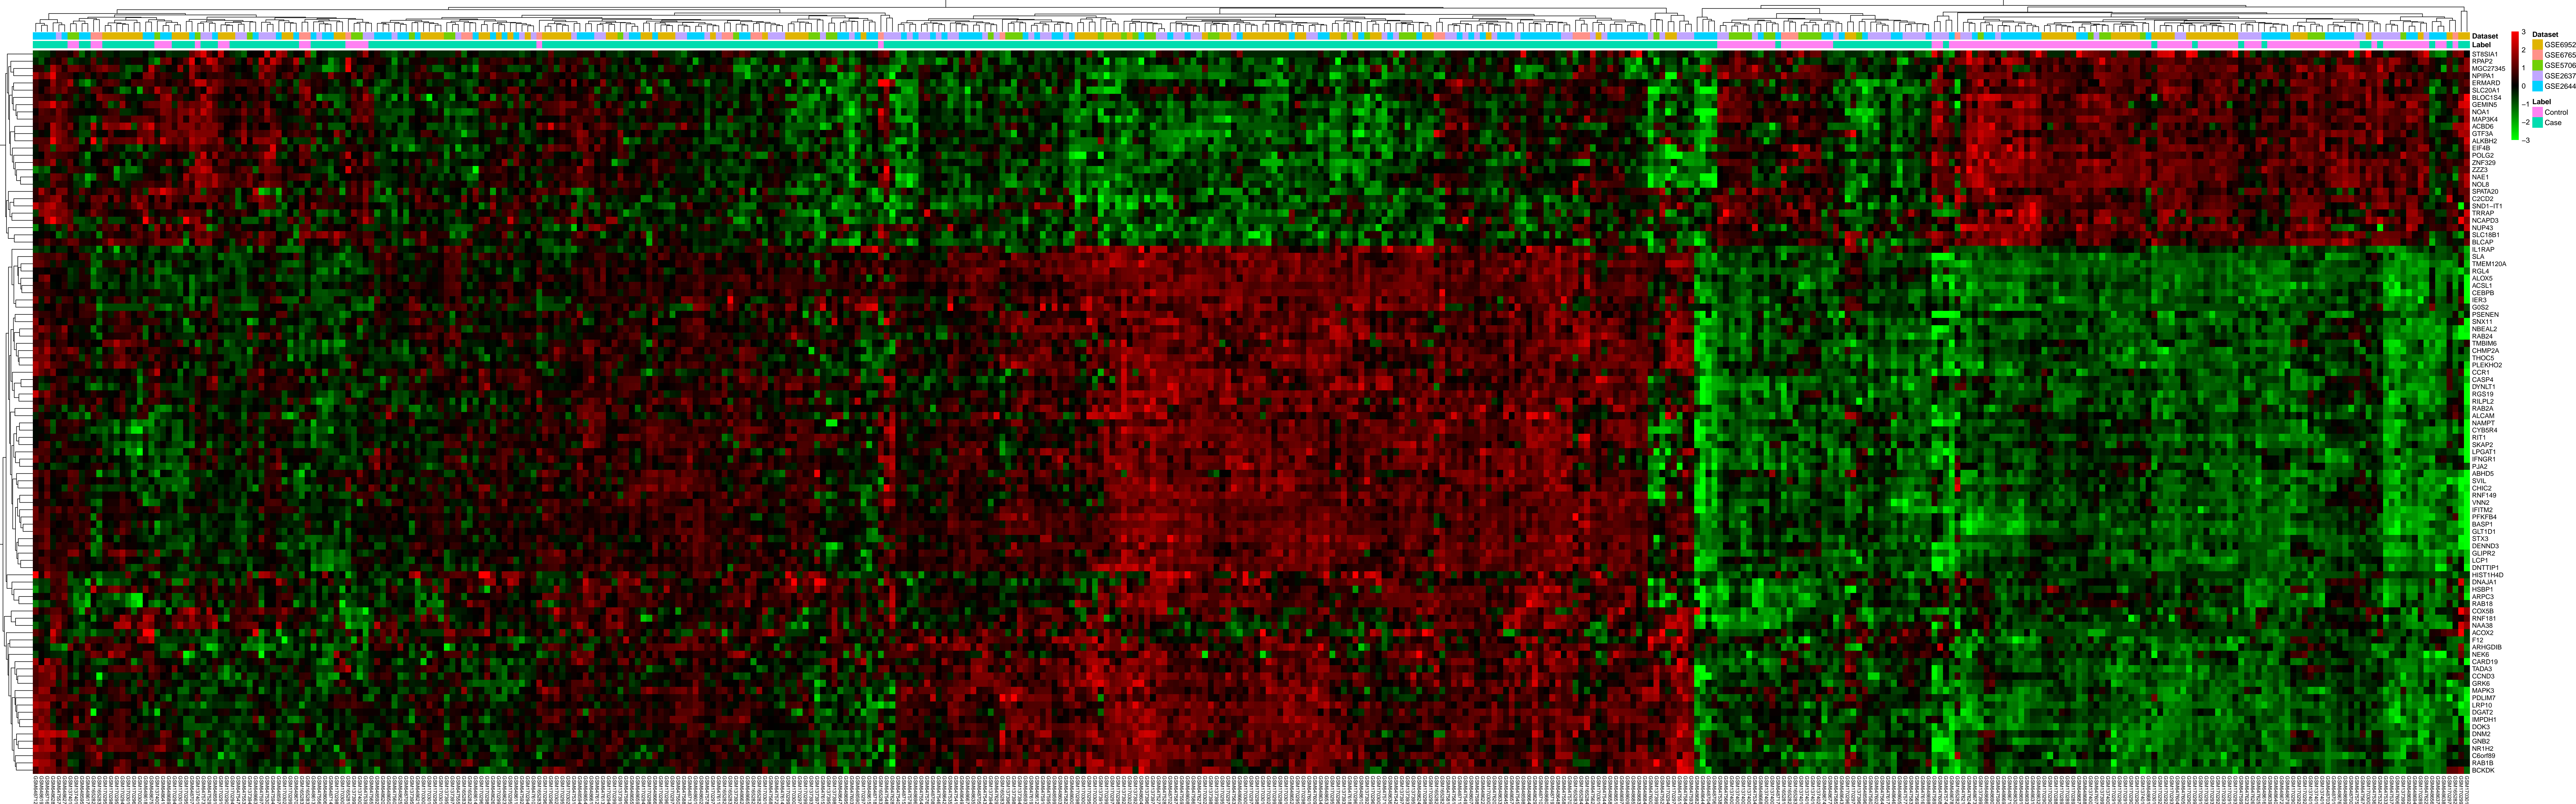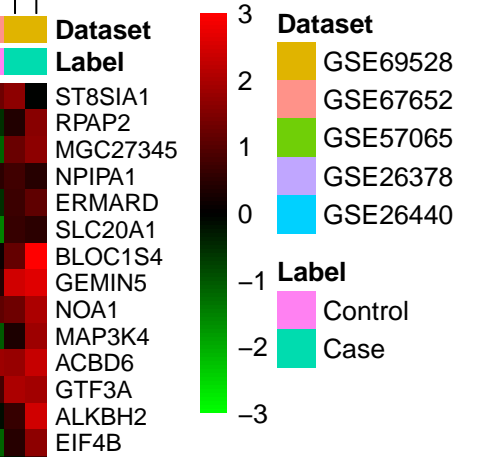

Supplement: 13205_2017_713_MOESM1_ESM.pdf [file 13205_2017_713_MOESM1_ESM.pdf]
